# Supplementary material for: A recrystallization approach to repairing spent LiFePO4 black mass
Source: Royal Society of Chemistry journal article supplement (doi:10.1039/d3ta00655g), 2023-01-01
Supplement: d3ta00655g1.pdf [file d3ta00655g1.pdf]

# A Recrystallization Approach to Repairing Spent LiFePO<sub>4</sub> Black Mass

Zhongheng Wang<sup>1,2</sup>, Hui Xu<sup>3</sup>, Zhiruo Liu<sup>1,2</sup>, Mingzhe Jin<sup>1,2</sup>, Linghao Deng<sup>1,2</sup>, Sa Li<sup>1,2\*</sup>  
and Yunhui Huang<sup>1,2\*</sup>

<sup>1</sup>School of Materials Science and Engineering, Tongji University, Shanghai 201804, China

<sup>2</sup>Institute of New Energy for Vehicles, Tongji University, Shanghai 201804, China

<sup>3</sup>School of Materials Science and Engineering, Shanghai Institute of Technology, Shanghai, 201804, China

\*E-mail: [lisa@tongji.edu.cn](mailto:lisa@tongji.edu.cn) (Dr. Sa Li) and [huangyh@mail.hust.edu.cn](mailto:huangyh@mail.hust.edu.cn) (Prof. Yunhui Huang)

**Table S1** ICP-OES result of untreated/repared (300°C treated) spent LFP.

| Sample       | Untreated |        |       | Repared |        |        |
|--------------|-----------|--------|-------|---------|--------|--------|
|              | Li        | Fe     | P     | Li      | Fe     | P      |
| Weight ratio | ~3.24%    | 28.71% | 16.2% | ~4.07%  | 32.65% | 18.09% |
| Atomic ratio | 0.904     | 1      | 1.019 | 1.003   | 1      | 0.999  |

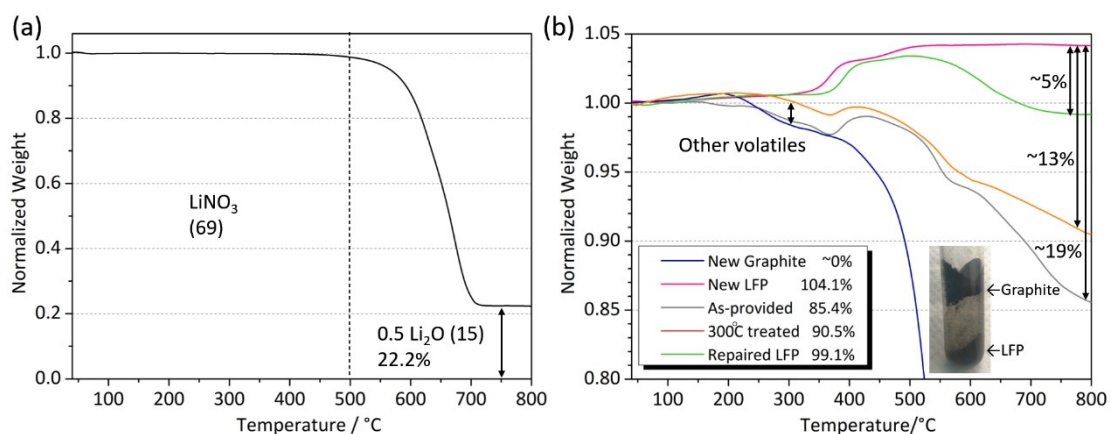

**Fig. S1** TG curves of (a) LiNO<sub>3</sub> pyrolysis and (b) different samples (the 300°C-treated sample was not processed by the centrifuging separation, the inserted image is a photograph of the 300°C-treated sample after separation).

## Calculation of Gibbs Free Energy

The Gibbs free energy change of related reactions in Table 1 was calculated based on the following formula (with data & reference in Table S2):

$$\Delta_r G_T^\ominus = \Delta_r H_T^\ominus - T \Delta_r S_T^\ominus \quad (\text{S1})$$

$$\Delta C_{P,m}(T) = \Delta a + \Delta bT + \Delta cT^{-2} \quad (\text{S2})$$

$$\begin{aligned} \Delta_r H_T^\ominus &= \Delta_r H_{298}^\ominus + \int_{298.15}^T \frac{\Delta C_p dt}{T} = \Delta_r H_{298}^\ominus + \Delta a(T - 298.15) + \frac{\Delta b(T^2 - 298.15^2)}{2} \\ &+ \Delta c \left( \frac{1}{T} - \frac{1}{298.15} \right) \end{aligned} \quad (\text{S3})$$

$$\begin{aligned} \Delta_r S_T^\ominus &= \Delta_r S_{298}^\ominus + \int_{298.15}^T \frac{\Delta C_p dt}{T} = \Delta_r S_{298}^\ominus + \Delta a \ln(T - 298.15) + \Delta b(T - 298.15) \\ &+ \Delta c \left( \frac{1}{T} - \frac{1}{298.15} \right) \end{aligned} \quad (\text{S4})$$

**Table S2** Thermodynamic properties of related substances.

| Substance                       | $\Delta_f H_{298}^\ominus$<br>(kJ/mol) | $S_{298}^\ominus$<br>(J/mol·K) | $\Delta C_{P,m}(T) = a + bT + cT^{-2}$ (J/mol·K) |          |             | Ref. |
|---------------------------------|----------------------------------------|--------------------------------|--------------------------------------------------|----------|-------------|------|
|                                 |                                        |                                | a                                                | $10^3$ b | $10^{-5}$ c |      |
| *FePO <sub>4</sub>              | -1297.000                              | 100.000                        | 122.490                                          | 55.100   | -40.380     | 1    |
| FePO <sub>4</sub>               | -1289.56                               | 108.51                         |                                                  |          |             | 2    |
| FePO <sub>4</sub>               | -1220.4                                |                                |                                                  |          |             | 3    |
| *LiFePO <sub>4</sub>            | -1591.023                              | 130.950                        | 102.680                                          | 95.700   | -14.00      | 4,5  |
| LiFePO <sub>4</sub>             | -1514.8                                | 136.75                         |                                                  |          |             | 2    |
| LiFePO <sub>4</sub>             | -1392.45                               |                                |                                                  |          |             | 3    |
| LiNO <sub>3</sub>               | -483.1                                 | 90                             | 78.73                                            | 191.74   |             | 6,7  |
| Li <sub>2</sub> O               | -598.73                                | 37.91                          | 66.92                                            | 17.27    | -17.7       | 8    |
| LiOH                            | -484.67                                | 42.68                          | 50.168                                           | 34.476   | -9.498      | 8    |
| Li <sub>2</sub> CO <sub>3</sub> | -1216.038                              | 90.169                         | 42.530                                           | 177.399  |             | 8    |
| Li (BCC)                        | 0                                      | 29.08                          | 13.941                                           | 34.359   |             | 8    |
| N <sub>2</sub> (g)              | 0                                      | 191.5                          | 27.86                                            | 4.28     |             | 8    |
| NO <sub>2</sub> (g)             | 33.1                                   | 239.9                          | 35.68                                            | 22.91    | -4.7        | 8    |
| C                               | 0                                      | 5.740                          | 0.109                                            | 38.940   | -1.481      | 8    |
| O <sub>2</sub> (g)              | 0                                      | 205.04                         | 29.96                                            | 4.18     | -1.674      | 8    |
| CO(g)                           | -110.541                               | 197.660                        | 28.409                                           | 4.100    | -0.460      | 8    |
| CO <sub>2</sub> (g)             | -393.505                               | 213.770                        | 44.141                                           | 9.037    | -8.535      | 8    |
| Fe <sub>2</sub> O <sub>3</sub>  | -824.248                               | 87.404                         | 98.282                                           | 77.822   | -14.853     | 8    |
| P <sub>4</sub> O <sub>10</sub>  | -3009.936                              | 228.781                        | 149.754                                          | 324.762  | -31.062     | 8    |
| H <sub>2</sub> O (l)            | -241.826                               | 188.959                        | 29.999                                           | 10.711   | 0.335       | 8    |

Notably,  $\text{LiFePO}_4$  and  $\text{FePO}_4$  have multiple reported thermodynamic data with considerable variation, we chose the data (\*) with completed a/b/c factors for better temperature-dependent calculation. In fact, the calculated  $\Delta_r G_{298}^\ominus$  of LFP half-cell reaction ( $\text{Li} + \text{FePO}_4 = \text{LiFePO}_4$ ) is  $-294.57$  kJ/mol and its emf value (3.054V) is slightly deviated from the actual experimental result (3.425V). Therefore, the calculated data in Table.1 may contain a minor bias of  $\sim 32$  kJ/mol, thus we adjusted the value based on the correct emf value and provided an emendatory table (Table.S3). Fundamentally, the variation does not affect the comparison of re-lithiation reactions with different Li salt, since they shared the same  $\text{FePO}_4 \rightarrow \text{LiFePO}_4$  procedure and the thermodynamic data of other common inorganics were well-established.

**Table S3** Emendatory standard Gibbs free energy change for related reactions.

| <b>No</b> | <b>Reaction</b>                                                                                                      | $\Delta_r G_{298}^\ominus$<br>(kJ mol <sup>-1</sup> ) |
|-----------|----------------------------------------------------------------------------------------------------------------------|-------------------------------------------------------|
| 1         | $\text{FePO}_4 + \text{Li} \rightarrow \text{LiFePO}_4$                                                              | -326.58                                               |
| 2         | $\text{FePO}_4 + 0.5 \text{Li}_2\text{CO}_3 + 0.25 \text{C} \rightarrow \text{LiFePO}_4 + 0.75 \text{CO}_2$          | -55.87                                                |
| 3         | $\text{FePO}_4 + \text{LiOH} + 0.25\text{C} \rightarrow \text{LiFePO}_4 + 0.25 \text{CO}_2 + 0.5 \text{H}_2\text{O}$ | -100.79                                               |
| 4         | $\text{FePO}_4 + 0.5 \text{Li}_2\text{O} + 0.25\text{C} \rightarrow \text{LiFePO}_4 + 0.25 \text{CO}_2$              | -159.38                                               |
| 5         | $\text{FePO}_4 + \text{LiNO}_3 + 0.5 \text{C} \rightarrow \text{LiFePO}_4 + \text{NO}_2 + 0.5 \text{CO}_2$           | -91.45                                                |
| 6         | $\text{FePO}_4 + \text{LiNO}_3 + 1.5 \text{C} \rightarrow \text{LiFePO}_4 + 0.5 \text{N}_2 + 1.5 \text{CO}_2$        | -537.06                                               |

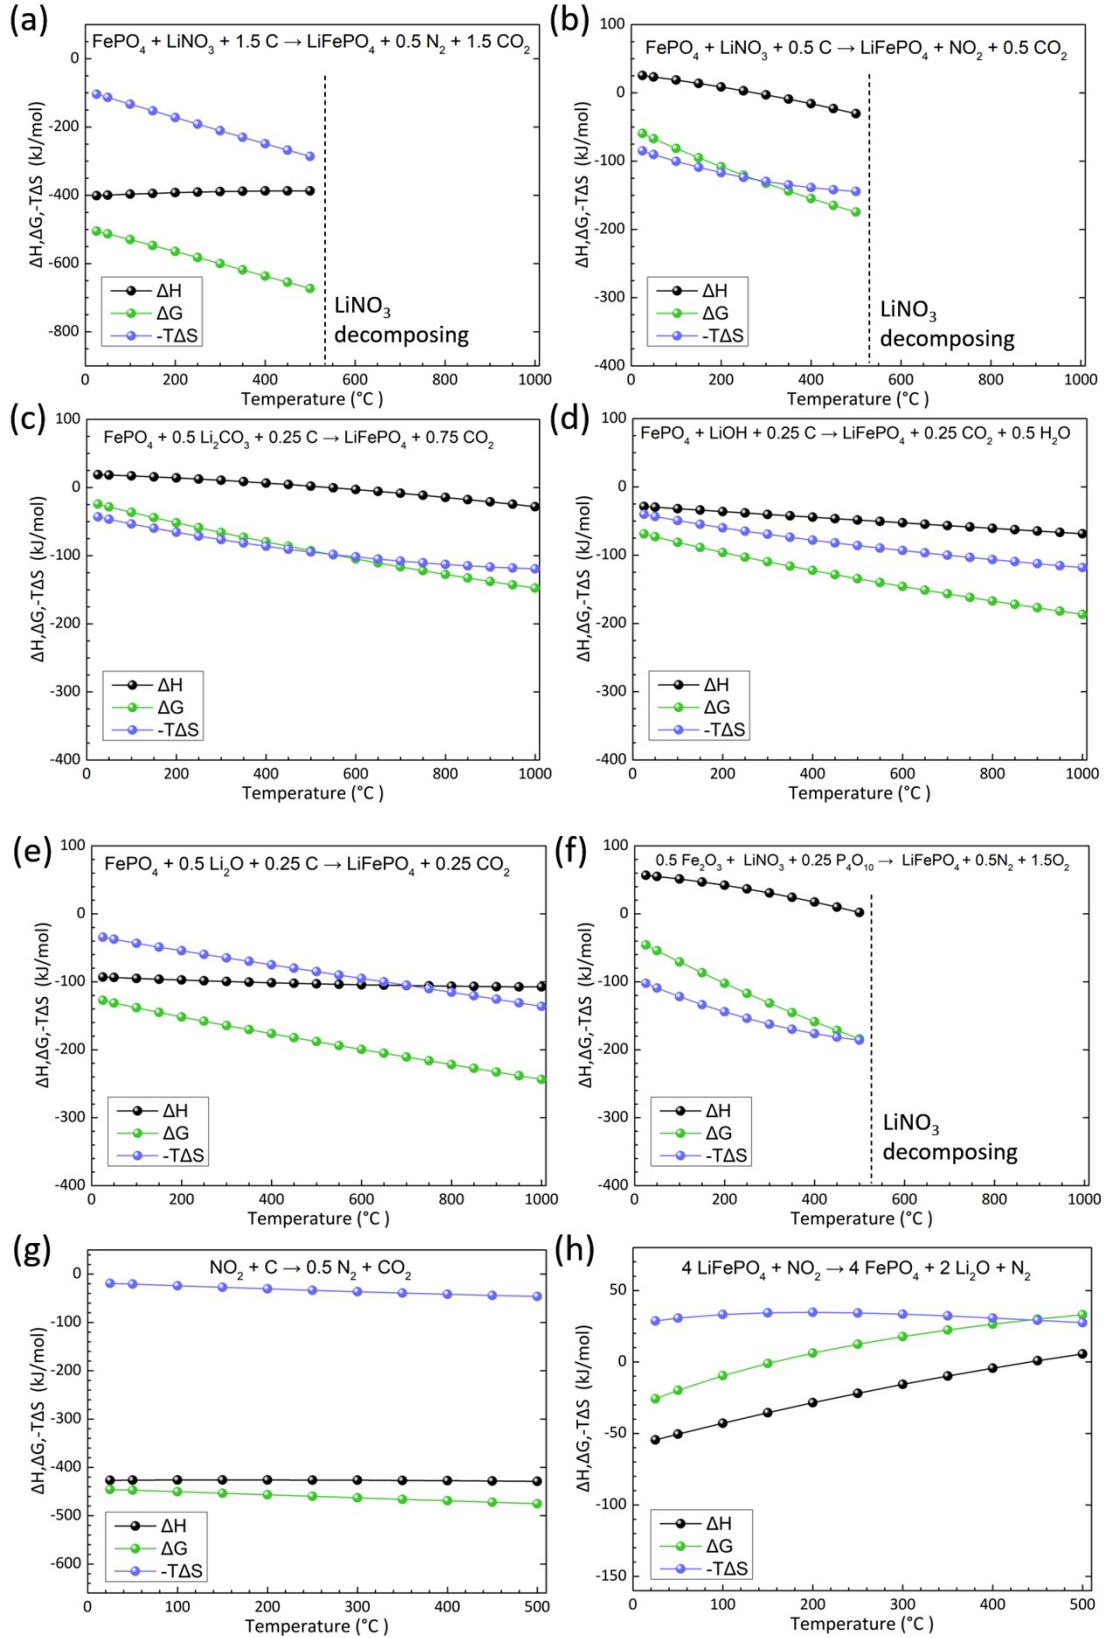

**Fig. S2** Temperature dependences of the calculated standard enthalpy change, the  $-T\Delta S$  value and the standard Gibbs free energy change of the related reactions.

## Structural Characterization

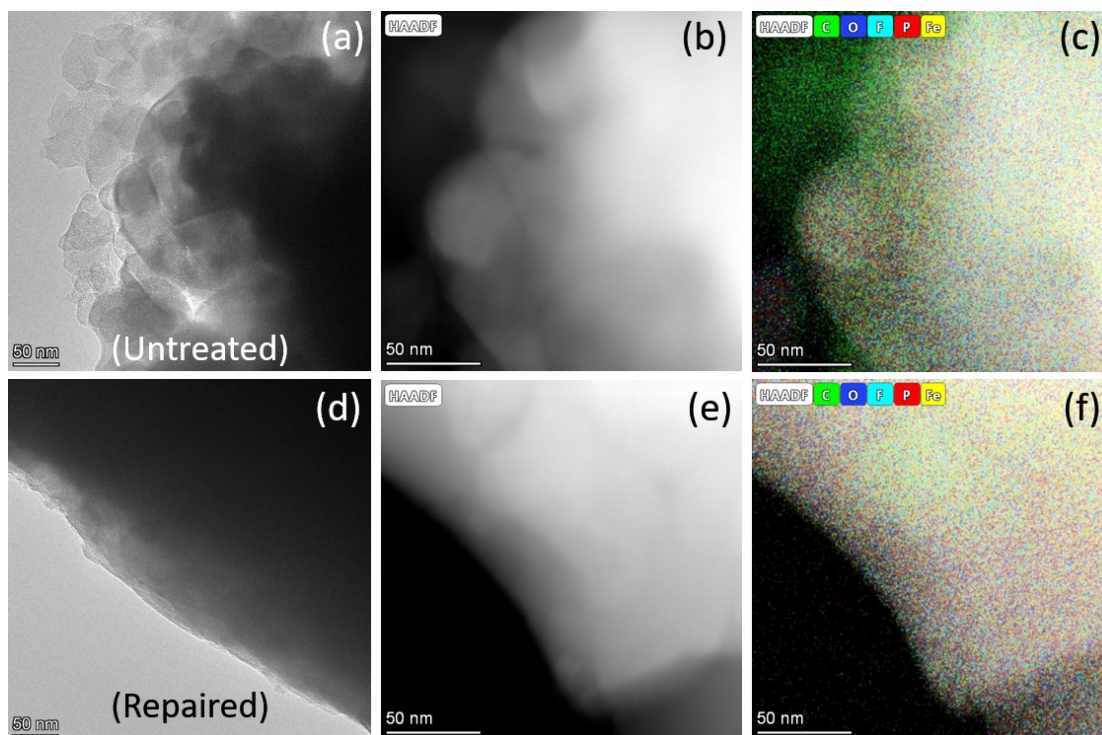

**Fig. S3** TEM images and corresponding STEM(HAADF)/EDS mapping of the (a)(b)(c) untreated and (d)(e)(f) repaired (300°C treated) spent LFP.

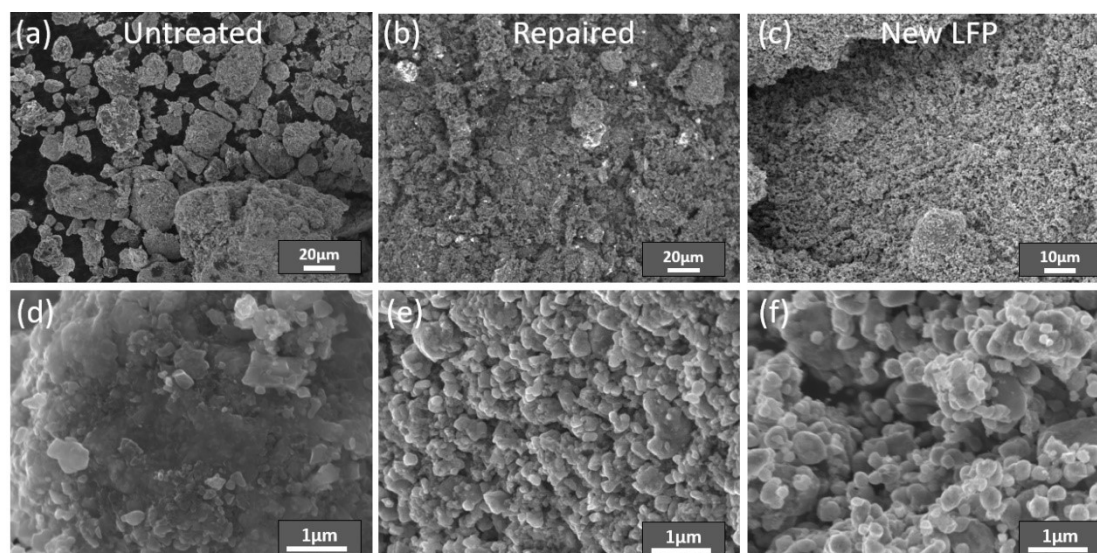

**Fig. S4** SEM images of (a)(d) untreated, (b)(e) repaired spent LFP and (c)(f) new LFP.

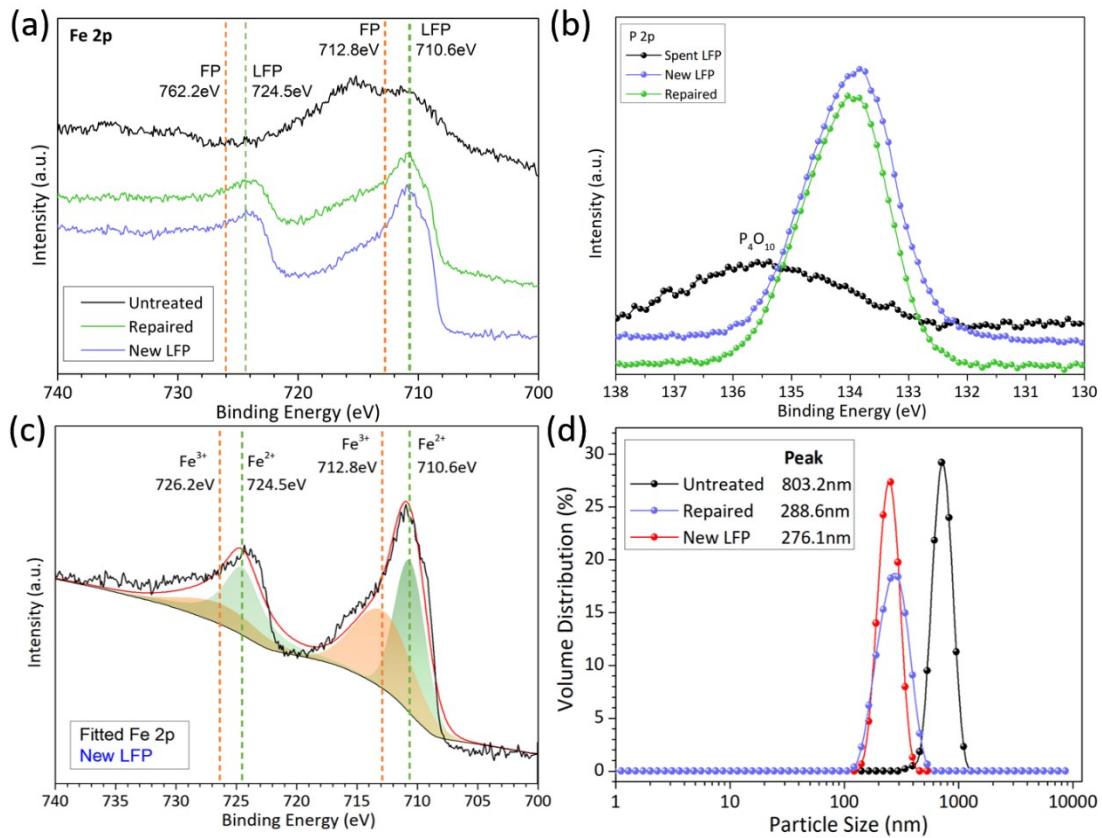

**Fig. S5** XPS spectra of untreated/repared spent LFP and new LFP: (a) Fe 2p; (b) P 2p and (c) fitted Fe 2p of new LFP; (d) Particle size distribution of untreated/repared spent LFP and new LFP.

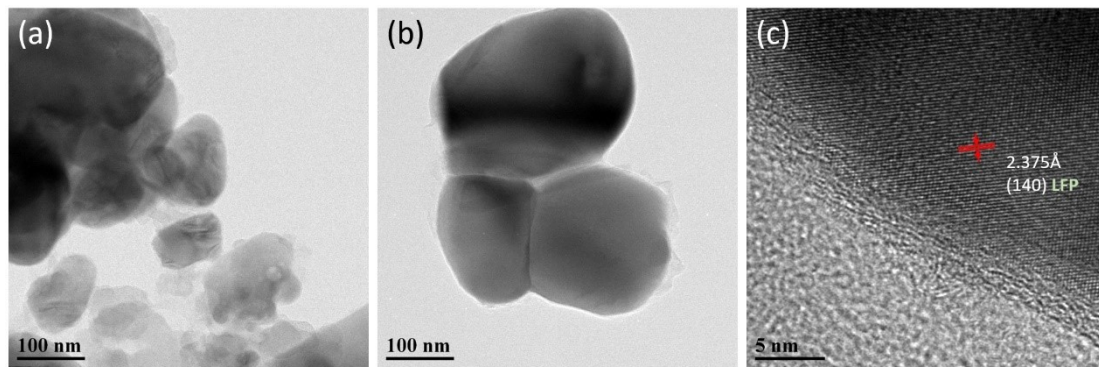

**Fig. S6** TEM images of (a) the repaired spent LFP and (b)(c) commercial new LFP.

## Practicability

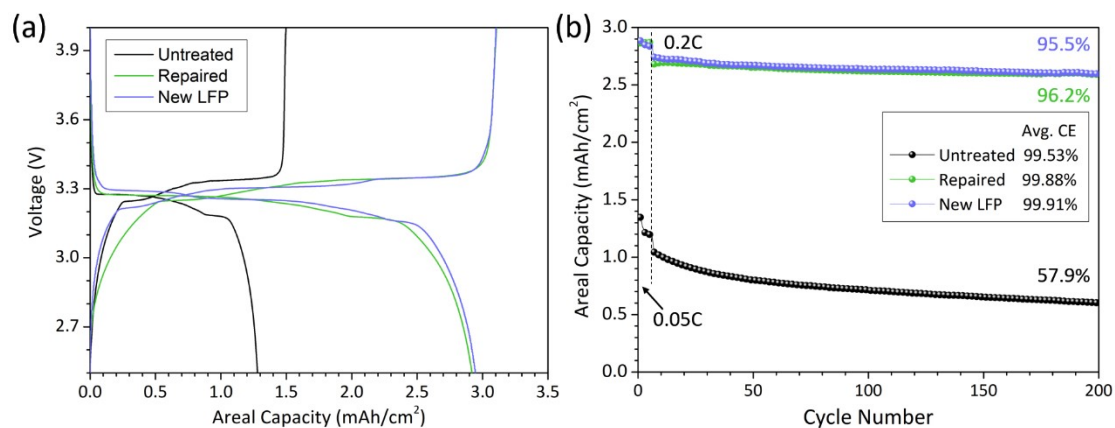

**Fig. S7** (a) Full-cell initial charge/discharge curves (0.05C) and (b) cycling stability of untreated/repaired spent LFP and new LFP cathode film ( $\sim 20\text{mg}/\text{cm}^2$ ) paired with commercial graphite anode (the retention rates of each sample were calculated based on their discharge capacity at the 10<sup>th</sup> cycle).

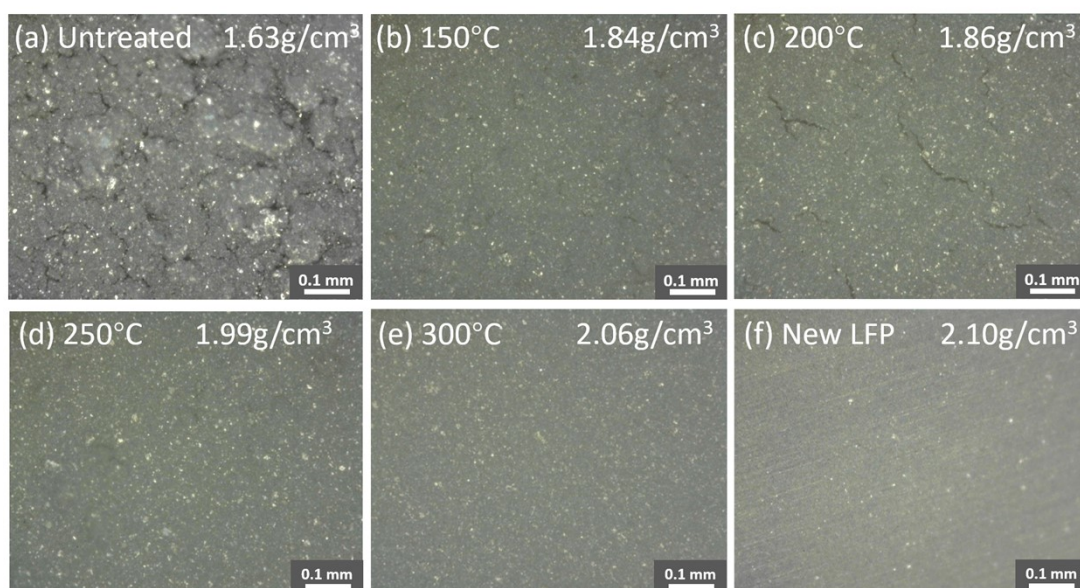

**Fig. S8** Optical microscopic images of cathode film prepared with (a) untreated spent LFP and (b-e) repaired mixture sample treated in different temperatures and (f) commercial new LFP (with their measured compaction density marked on the top).

The CO<sub>2</sub> and NO<sub>2</sub> emission of the heating process were investigated by mass spectrometry (MS). Typically, 0.08g sample mixture was sealed in a 20ml glass vessel with brass cap (filled with air) and heated to 300°C for 30min and naturally cooled down to room temperature. The gas sample within the vessel was obtained by sampling needle (0.5ml) and injected to the MS intake and tested with retention time of 2min. For comparison, the ambient air was tested in the same procedure. The CO<sub>2</sub> emission of the heated mixture can be semiquantitative estimated by the integral area of CO<sub>2</sub> peak (m/z=44) of the gas sample and air (as control sample). As result, the integral area of CO<sub>2</sub> peak in the sample is ~4.1 times higher than the CO<sub>2</sub> peak in ambient air (0.036%). Therefore, the estimated CO<sub>2</sub>e of the 0.08g mixture is ~3.81mg (4.1\*0.036\*0.02L\*1.29g/L), assuming the CO<sub>2</sub> was evenly dispensed in the 20ml vessel without surface adsorption. The spent LFP content in mixture is about 90% thus the direct CO<sub>2</sub>e of repairing 1kg spent LFP with this method is ~0.053kg. Additionally, the NO<sub>2</sub> in the gas sample was barely detectable (less than 10% intensity of the CO<sub>2</sub>) thus we do not further discuss the elimination of nitric oxides. The trace amount of NO<sub>x</sub> released during the repair process can be simply neutralized by whitewash tail gas treatment, along with the PF<sub>5</sub> derived from residual electrolyte. Theoretically, the maximum direct CO<sub>2</sub>e in this method is 0.076 kg/kg (assuming the 8wt% LiNO<sub>3</sub> was totally reduced by carbon, as the reaction 5) and the maximum NO<sub>2</sub> emission is 0.053 kg/kg (assuming the LiNO<sub>3</sub> was all decomposed in to NO<sub>2</sub>, corresponded to the reaction 4 in Table.1). The concentration of CO<sub>2</sub> and NO<sub>2</sub> are correlated in a sealed environment (reaction 15) with the presence of abundant carbon on spent LFP. Therefore, the estimated NO<sub>2</sub> emission of the heating process is 0.023 kg/kg (0.08%) at most.

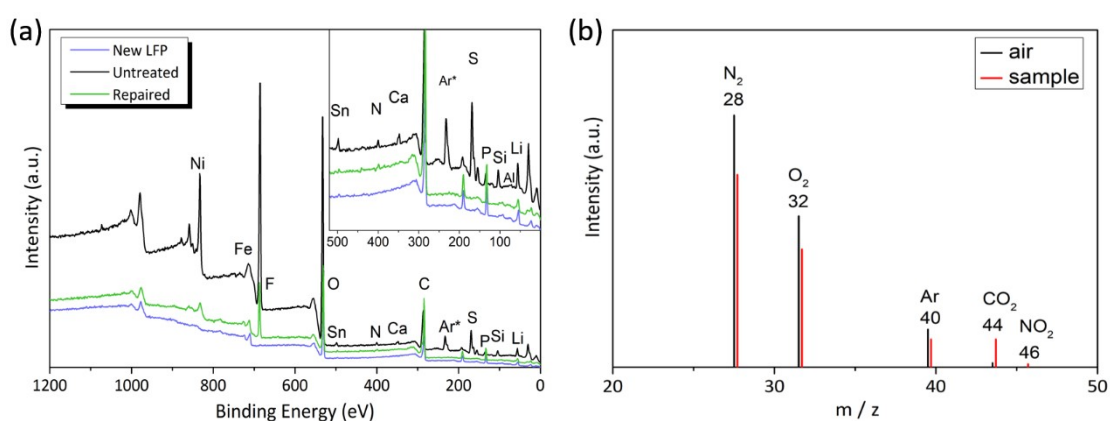

**Fig. S9** (a) XPS survey scan of untreated/repared spent LFP and purchased new LFP; (b) mass spectra of the pyrolytic gas sample and ambient air.



## Ecological & Economic Evaluation

The overall GHG emission and cost of the 3 typical procedures were summarized (from spent battery to LFP final product) based on the typical procedures in **Table S4-S6**. All values of chemicals were calculated based on Chinese wholesale average market price surveyed in 2021/6 (relatively stable stage) and converted to USD by fixed exchange rate of 1USD=6.4CNY. Additionally, the alternative fuel source was also listed in these table (for example, coal is the cheapest fuel but has the highest CO<sub>2</sub>e, while the electricity is the counter-example), the final values in blanket are concluded based on the cost of the median case (fueled by natural gas).

**Table S4** Summarized cost and CO<sub>2</sub>e of repairing 1t spent LFP via this method.

| Material & Process   | CO <sub>2</sub> e (t)                                  | Cost (\$)                                       | Notes and References                                                                                                                                                                                                                                                                    |
|----------------------|--------------------------------------------------------|-------------------------------------------------|-----------------------------------------------------------------------------------------------------------------------------------------------------------------------------------------------------------------------------------------------------------------------------------------|
| Spent LFP shipping   | 0.010                                                  | 950                                             | Calculated based on the Argonne GREET Model, <sup>9</sup> assumed 1.25t LFP black mass was collected locally and carried 480km through rail transportation.                                                                                                                             |
| Spent LFP extraction | 0.111                                                  |                                                 | All by physical process: 0.0886kWh/kg LFP cathode according to Ref. <sup>10</sup>                                                                                                                                                                                                       |
| LiNO <sub>3</sub>    | -                                                      | 920                                             | (~87kg, ~9kg of lithium inventory)                                                                                                                                                                                                                                                      |
| Industrial sugar     | -                                                      | 5                                               |                                                                                                                                                                                                                                                                                         |
| Mixing and drying    | 0.014                                                  | 20                                              | Assumed mixed by a 200L V-shape barrel industrial mixer for 10 runs (10*2000W*30min=10kWh) and briefly dried in 60°C oven (~7kWh)                                                                                                                                                       |
| Heating (12MJ)       | <b>0.732 (LNG)</b><br>1.669 (Coal)<br>2.748 (Electric) | 70 (Coal)<br><b>200 (LNG)</b><br>495 (Electric) | Analogical energy cost of LFP synthesis, <sup>11</sup> related CO <sub>2</sub> e was calculated based on the fuel value: coal 29.3MJ/kg (7.99 MJ/kg CO <sub>2</sub> e, ~\$152/t) and natural gas 50.2MJ/kg (18.25 MJ/kg CO <sub>2</sub> e, ~\$0.5/m <sup>3</sup> ) with 90% efficiency. |
| Tail gas treatment   | 0.053*                                                 | 25                                              | *Measured CO <sub>2</sub> e by semiquantitative mass spectrometry analysis result.                                                                                                                                                                                                      |
| Others               | 0.008                                                  | 150                                             | Analogical estimation of Ref. <sup>12</sup>                                                                                                                                                                                                                                             |
| <b>Total</b>         | 0.928-2.944<br><b>(0.928)</b>                          | 2140-2565<br><b>(2270)</b>                      | Electricity-related CO <sub>2</sub> e were calculated based on the east China grid emission factor (0.809kg/kWh)                                                                                                                                                                        |

**Table S5** Summarized cost and CO<sub>2</sub>e of repairing 1t spent LFP via annealing method.

| Material & Process              | CO <sub>2</sub> e (t)                                                    | Cost (\$)                                                     | Notes and References                                                                                                                                                                                                                                                                    |
|---------------------------------|--------------------------------------------------------------------------|---------------------------------------------------------------|-----------------------------------------------------------------------------------------------------------------------------------------------------------------------------------------------------------------------------------------------------------------------------------------|
| Spent LFP shipping              | 0.010                                                                    | 950                                                           | Same as the <b>Table S4</b>                                                                                                                                                                                                                                                             |
| Spent LFP extraction            | 0.111                                                                    |                                                               |                                                                                                                                                                                                                                                                                         |
| Li <sub>2</sub> CO <sub>3</sub> | -                                                                        | 770                                                           | (~49kg, ~9kg of lithium inventory)                                                                                                                                                                                                                                                      |
| Industrial sugar                | -                                                                        | 15                                                            |                                                                                                                                                                                                                                                                                         |
| Mixing                          | 0.008                                                                    | 10                                                            | Assumed mixed by a 200L V-shape barrel industrial mixer for 10 runs (10*2000W*30min=10kWh)                                                                                                                                                                                              |
| Annealing (30-54MJ)             | 1.826- <b>3.288</b> (LNG)<br>4.172-7.509 (Coal)<br>6.87-12.36 (Electric) | 170-310 (Coal)<br>510- <b>920</b> (LNG)<br>1245-2250 (Elect.) | Analogical energy cost of LFP synthesis, <sup>11</sup> related CO <sub>2</sub> e was calculated based on the fuel value: coal 29.3MJ/kg (7.99 MJ/kg CO <sub>2</sub> e, ~\$152/t) and natural gas 50.2MJ/kg (18.25 MJ/kg CO <sub>2</sub> e, ~\$0.5/m <sup>3</sup> ) with 90% efficiency. |
| Protective Gas                  | -                                                                        | <b>230</b> (N <sub>2</sub> )<br>565 (Ar/H <sub>2</sub> )      | 4h*3600*2mL/s + 40L per 500g                                                                                                                                                                                                                                                            |
| Tail gas treatment              | 0.166                                                                    | 25                                                            | Estimated CO <sub>2</sub> e of decomposing all Li <sub>2</sub> CO <sub>3</sub> , sugar and 1% of carbon residue.                                                                                                                                                                        |
| Others                          | 0.016                                                                    | 300                                                           | Analogical estimation of Ref. <sup>12</sup>                                                                                                                                                                                                                                             |
| <b>Total</b>                    | 2.137-12.67<br><b>(3.599)</b>                                            | 2240-4655<br><b>(3220)</b>                                    | Electricity-related CO <sub>2</sub> e were calculated based on the east China grid emission factor (0.809kg/kWh)                                                                                                                                                                        |

**Table S6** Summarized cost and CO<sub>2</sub>e of repairing 1t spent LFP via hydrometallurgical recycle (to Li<sub>2</sub>CO<sub>3</sub>) and re-synthesis (via FePO<sub>4</sub> route) process.

| Material & Process                                    | CO <sub>2</sub> e (t)                                                     | Cost (\$)                                                         | Notes and References                                                                                                                                                                                                             |
|-------------------------------------------------------|---------------------------------------------------------------------------|-------------------------------------------------------------------|----------------------------------------------------------------------------------------------------------------------------------------------------------------------------------------------------------------------------------|
| Spent LFP shipping                                    | 0.012                                                                     | 1140                                                              | Same as the <b>Table S4</b> , but cost more raw material (~1.5t) to extract ~0.24t Li <sub>2</sub> CO <sub>3</sub> (with 95% leaching efficiency) for producing 1t LFP.                                                          |
| Spent LFP extraction                                  | 0.133                                                                     |                                                                   |                                                                                                                                                                                                                                  |
| H <sub>2</sub> SO <sub>4</sub> (~0.75t)               | -                                                                         | 150                                                               | H <sub>2</sub> O <sub>2</sub> and other additives were omitted.                                                                                                                                                                  |
| FePO <sub>4</sub> (~0.95t)                            | -                                                                         | 1630                                                              | Purchased as raw material for producing 1t LFP.                                                                                                                                                                                  |
| Fe <sub>2</sub> SO <sub>4</sub> (~1.1t) (by-product)  | -                                                                         | -240                                                              | Assumed Fe <sub>2</sub> SO <sub>4</sub> by-product was collected and sold to flocculant manufacturer.                                                                                                                            |
| Filtration & Calcination                              | 0.048 + 0.936 (LNG)                                                       | 270                                                               | Pre-treatment to avoid HF release during leaching, <sup>10</sup> by annealing in LNG furnace.                                                                                                                                    |
| Grinding & Leaching                                   | 0.058                                                                     |                                                                   | Energy consumption: 0.036 and 0.0352 (kWh/kg) respectively, according to Ref. <sup>13</sup> Assuming the extracted salts were directly used as precursor without calcinated. <sup>14</sup>                                       |
| Re-synthesis<br>Annealing<br>(60-105MJ) <sup>11</sup> | 3.652- <b>6.393</b> (LNG)<br>8.341-14.60 (Coal)<br>13.73-24.03 (Electric) | 470-725 (Coal)<br>1010- <b>1790</b> (LNG)<br>2630-5250 (Electric) | Related CO <sub>2</sub> e was calculated based on the fuel value: coal 29.3MJ/kg (7.99 MJ/kg CO <sub>2</sub> e, ~\$152/t) and natural gas 50.2MJ/kg (18.25 MJ/kg CO <sub>2</sub> e, ~\$0.5/m <sup>3</sup> ) with 90% efficiency. |
| Protective Gas                                        | -                                                                         | 410 (N <sub>2</sub> )                                             | 8h*3600*2mL/s + 40L per 500g                                                                                                                                                                                                     |
| Direct CO <sub>2</sub> e                              | 0.143                                                                     | -                                                                 | Estimated CO <sub>2</sub> e of decomposing all Li <sub>2</sub> CO <sub>3</sub> .                                                                                                                                                 |
| Others                                                | 0.024                                                                     | 450                                                               | Analogical estimation of Ref. <sup>12</sup>                                                                                                                                                                                      |
| <b>Total</b>                                          | 5.006-25.38<br><b>(7.747)</b>                                             | 4280-9060<br><b>(5600)</b>                                        | Electricity-related CO <sub>2</sub> e were calculated based on the east China grid emission factor (0.809kg/kWh)                                                                                                                 |

## References

1. A. I. Zaitsev, Z. V. Dobrokhotova, A. D. Litvina and B. M. Mogutnov, *Journal of the Chemical Society-Faraday Transactions*, 1995, **91**, 703-712.
2. A. V. Churikov, A. V. Ivanishchev, A. V. Ushakov, I. M. Gamayunova and I. A. Leenson, *Journal of Chemical & Engineering Data*, 2013, **58**, 1747-1759.
3. R. G. Iyer, C. Delacourt, C. Masquelier, J. M. Tarascon and A. Navrotsky, *Electrochemical and Solid State Letters*, 2006, **9**, A46-A48.
4. A. La Iglesia, *Estudios Geologicos-Madrid*, 2009, **65**, 109-119.
5. S. Loos, D. Gruner, M. Abdel-Hafiez, J. Seidel, R. Huettl, A. U. B. Wolter, K. Bohmhammel and F. Mertens, *Journal of Chemical Thermodynamics*, 2015, **85**, 77-85.
6. H. D. B. Jenkins and D. F. C. Morris, *Philosophical Magazine*, 1977, **35**, 1091-1097.
7. M. J. Maeso and J. Largo, *Thermochimica Acta*, 1993, **222**, 195-201.
8. B. M. Beglov, *Inorganic Materials*, 1977, **13**, 1780-1784.
9. Argonne GREET Model, (<https://greet.es.anl.gov/>).
10. R. E. Ciez and J. F. Whitacre, *Nature Sustainability*, 2019, **2**, 148-156.
11. Y. Yu, D. Wang, K. Huang, X. Wang, Y. Liang, W. Sun, B. Chen and S. Chen, *Journal of Cleaner Production*, 2014, **82**, 213-220.
12. K. He, Z. Y. Zhang, L. Alai and F. S. Zhang, *J Hazard Mater*, 2019, **375**, 43-51.
13. J. B. Dunn, Gaines, L., Barnes, M., Sullivan, J. L. & Wang, M., *Material and Energy Flows in the Materials Production, Assembly, and End-of-Life Stages of the Automotive Lithium-Ion Battery Life Cycle.*, Argonne National Laboratory, 2014.
14. G. Majeau-Bettez, T. R. Hawkins and A. H. Stromman, *Environmental Science & Technology*, 2011, **45**, 4548-4554.
